# Supplementary material for: Motor of Mutual Retention
Source: Preprints.org preprint supplement (doi:10.20944/preprints202203.0271.v1), 2022-03-19
Supplement: Supplementary file 1 [file supplementary]

### **Conflicts of Interest**

The author declares financial interests that may be considered as potential competing interests:  
Marco Aurélio Nunes Silva has patent BR 10 2022 001385-3.
